# Supplementary material for: Antioxidant Potential of Adiponectin and Full PPAR-γ Agonist in Correcting Streptozotocin-Induced Vascular Abnormality in Spontaneously Hypertensive Rats
Source: Hindawi journal article supplement (doi:10.1155/2021/6661181), 2021-10-14
Supplement: f1 [file 6661181.f1.pdf]

| Parameters      | Groups  | Days of Observation |        |        | Day 28 |
|-----------------|---------|---------------------|--------|--------|--------|
|                 |         | Day 0               | Day 8  | Day 21 |        |
| Body Weight (g) | WKY     | 1) 245              | 1) 250 | 1) 275 | 1) 289 |
|                 |         | 2) 250              | 2) 255 | 2) 279 | 2) 300 |
|                 |         | 3) 240              | 3) 245 | 3) 271 | 3) 280 |
|                 |         | 4) 245              | 4) 240 | 4) 270 | 4) 280 |
|                 |         | 5) 240              | 5) 250 | 5) 275 | 5) 290 |
|                 |         | 6) 250              | 6) 260 | 6) 280 | 6) 295 |
|                 | SHR     | 1) 242              | 1) 248 | 1) 267 | 1) 284 |
|                 |         | 2) 245              | 2) 245 | 2) 275 | 2) 293 |
|                 |         | 3) 239              | 3) 240 | 3) 260 | 3) 270 |
|                 |         | 4) 238              | 4) 255 | 4) 258 | 4) 280 |
|                 |         | 5) 245              | 5) 255 | 5) 278 | 5) 284 |
|                 |         | 6) 240              | 6) 245 | 6) 264 | 6) 295 |
|                 | SHR+STZ | 1) 245              | 1. 200 | 1) 208 | 1) 209 |
|                 |         | 2) 242              | 2. 205 | 2) 210 | 2) 215 |
|                 |         | 3) 248              | 3. 198 | 3) 200 | 3) 197 |
|                 |         | 4) 240              | 4. 202 | 4) 213 | 4) 210 |
| 5) 246          |         | 5. 204              | 5) 217 | 5) 223 |        |
| 6) 247          |         | 6. 191              | 6) 200 | 6) 197 |        |
| SHR+STZ+Irb     | 1. 248  | 1. 216              | 1. 206 | 1. 208 |        |
|                 | 2. 244  | 2. 220              | 2. 200 | 2. 203 |        |
|                 | 3. 247  | 3. 218              | 3. 214 | 3. 216 |        |
|                 | 4. 256  | 4. 213              | 4. 221 | 4. 221 |        |

|  |                     |                                                          |                                                          |                                                          |                                                          |
|--|---------------------|----------------------------------------------------------|----------------------------------------------------------|----------------------------------------------------------|----------------------------------------------------------|
|  |                     | 5. 255<br>6. 250                                         | 212<br>211                                               | 5. 217<br>6. 208                                         | 5. 217<br>6. 207                                         |
|  | SHR+STZ+Pio         | 1) 254<br>2) 260<br>3) 248<br>4) 248<br>5) 252<br>6) 262 | 1) 205<br>2) 209<br>3) 201<br>4) 201<br>5) 205<br>6) 211 | 1) 207<br>2) 214<br>3) 200<br>4) 200<br>5) 207<br>6) 217 | 1) 217<br>2) 222<br>3) 212<br>4) 212<br>5) 221<br>6) 223 |
|  | SHR+STZ+Adp         | 1) 252<br>2) 256<br>3) 248<br>4) 248<br>5) 252<br>6) 258 | 1) 213<br>2) 220<br>3) 206<br>4) 206<br>5) 213<br>6) 223 | 1) 215<br>2) 224<br>3) 206<br>4) 206<br>5) 212<br>6) 227 | 1) 206<br>2) 210<br>3) 202<br>4) 202<br>5) 206<br>6) 212 |
|  | SHR+STZ+Adp<br>+Irb | 250<br>263<br>256<br>249<br>247<br>241                   | 1. 212<br>2. 211<br>3. 210<br>4. 208<br>5. 202<br>6. 205 | 1. 220<br>2. 212<br>3. 204<br>4. 202<br>5. 200<br>6. 198 | 1. 208<br>2. 196<br>3. 200<br>4. 198<br>5. 212<br>6. 210 |
|  | SHR+STZ+Adp<br>+Pio | 1) 247<br>2) 252<br>3) 242<br>4) 242<br>5) 247<br>6) 254 | 1) 201<br>2) 210<br>3) 192<br>4) 192<br>5) 201<br>6) 214 | 1) 200<br>2) 210<br>3) 190<br>4) 190<br>5) 200<br>6) 214 | 1) 209<br>2) 214<br>3) 204<br>4) 204<br>5) 209<br>6) 216 |

|                        |             |       |        |        |        |
|------------------------|-------------|-------|--------|--------|--------|
| Water intake<br>(ml/d) | WKY         | 1) 43 | 1) 44  | 1) 45  | 1) 45  |
|                        |             | 2) 44 | 2) 46  | 2) 48  | 2) 47  |
|                        |             | 3) 42 | 3) 42  | 3) 42  | 3) 43  |
|                        |             | 4) 42 | 4) 42  | 4) 42  | 4) 43  |
|                        |             | 5) 42 | 5) 44  | 5) 44  | 5) 45  |
|                        |             | 6) 44 | 6) 47  | 6) 4   | 6)48   |
|                        | SHR         | 1) 32 | 1) 34  | 1) 34  | 1) 37  |
|                        |             | 2) 34 | 2) 36  | 2) 37  | 2) 41  |
|                        |             | 3) 30 | 3) 32  | 3) 31  | 3) 33  |
|                        |             | 4) 30 | 4) 32  | 4) 31  | 4) 33  |
|                        |             | 5) 32 | 5) 34  | 5) 34  | 5) 37  |
|                        |             | 6) 35 | 6) 37  | 6) 38  | 6) 43  |
|                        | SHR+STZ     | 1) 33 | 1. 48  | 1) 48  | 1) 59  |
|                        |             | 2) 35 | 2. 51  | 2) 50  | 2) 62  |
|                        |             | 3) 31 | 3. 45  | 3) 46  | 3) 56  |
|                        |             | 4) 31 | 4. 45  | 4) 46  | 4) 56  |
|                        |             | 5) 33 | 5. 48  | 5) 48  | 5) 59  |
|                        |             | 6) 36 | 6. 52  | 6) 51  | 6) 63  |
|                        | SHR+STZ+Irb | 1) 38 | 7) 53  | 13) 54 | 19) 46 |
|                        |             | 2) 36 | 8) 51  | 14) 52 | 20) 52 |
|                        |             | 3) 35 | 9) 49  | 15) 50 | 21) 49 |
|                        |             | 4) 33 | 10) 47 | 16) 49 | 22) 55 |
|                        |             | 5) 30 | 11) 45 | 17) 48 | 23) 48 |
|                        |             | 6) 32 | 12) 43 | 18) 47 | 24) 50 |
| SHR+STZ+Pio            | 1) 34       | 1) 48 | 1) 50  | 1) 50  |        |
|                        | 2) 36       | 2) 51 | 2) 52  | 2) 53  |        |
|                        | 3) 32       | 3) 45 | 3) 48  | 3) 47  |        |
|                        | 4) 32       | 4) 45 | 4) 48  | 4) 47  |        |

|  |                     |                                                    |                                                       |                                                          |                                                          |
|--|---------------------|----------------------------------------------------|-------------------------------------------------------|----------------------------------------------------------|----------------------------------------------------------|
|  |                     | 5) 34<br>6) 37                                     | 5) 48<br>6) 52                                        | 5) 50<br>6) 53                                           | 5) 50<br>6) 54                                           |
|  | SHR+STZ+Adp         | 1) 36<br>2) 38<br>3) 34<br>4) 34<br>5) 36<br>6) 39 | 1) 46<br>2) 49<br>3) 43<br>4) 43<br>5) 46<br>6) 50    | 1) 47<br>2) 49<br>3) 45<br>4) 45<br>5) 47<br>6) 50       | 1) 57<br>2) 60<br>3) 54<br>4) 54<br>5) 57<br>6) 61       |
|  | SHR+STZ+Adp<br>+Irb | 1) 39<br>2) 37<br>3) 35<br>4) 34<br>5) 33<br>6) 32 | 7) 44<br>8) 45<br>9) 46<br>10) 47<br>11) 49<br>12) 51 | 13) 46<br>14) 47<br>15) 48<br>16) 49<br>17) 53<br>18) 51 | 19) 51<br>20) 54<br>21) 55<br>22) 57<br>23) 59<br>24) 60 |
|  | SHR+STZ+Adp<br>+Pio | 1) 34<br>2) 36<br>3) 32<br>4) 32<br>5) 34<br>6) 37 | 1) 45<br>2) 48<br>3) 42<br>4) 42<br>5) 45<br>6) 49    | 1) 49<br>2) 51<br>3) 47<br>4) 47<br>5) 49<br>6) 52       | 1) 55<br>2) 58<br>3) 52<br>4) 52<br>5) 55<br>6) 59       |

---

|                       |             |                                                                |                                                                    |                                                                      |                                                                      |
|-----------------------|-------------|----------------------------------------------------------------|--------------------------------------------------------------------|----------------------------------------------------------------------|----------------------------------------------------------------------|
| UFR<br>(mL/min/100 g) | WKY         | 1) 3.84<br>2) 4.28<br>3) 3.4<br>4) 3.4<br>5) 3.65<br>6) 4.45   | 1) 3.63<br>2) 3.84<br>3) 3.42<br>4) 3.42<br>5) 3.60<br>6) 3.93     | 1) 3.92<br>2) 4.13<br>3) 3.71<br>4) 3.71<br>5) 3.86<br>6) 4.22       | 1) 3.95<br>2) 4.16<br>3) 3.74<br>4) 3.74<br>5) 3.87<br>6) 4.25       |
|                       | SHR         | 1) 3.10<br>2) 3.15<br>3) 3.05<br>4) 3.05<br>5) 3.10<br>6) 3.17 | 1) 2.98<br>2) 3.07<br>3) 2.89<br>4) 2.89<br>5) 2.98<br>6) 3.11     | 1) 2.94<br>2) 3.48<br>3) 2.4<br>4) 2.4<br>5) 2.73<br>6) 3.69         | 1) 2.93<br>2) 3.36<br>3) 2.5<br>4) 2.5<br>5) 2.80<br>6) 3.51         |
|                       | SHR+STZ     | 1) 3.09<br>2) 3.13<br>3) 3.05<br>4) 3.05<br>5) 3.09<br>6) 3.15 | 1) 12.35<br>2) 12.84<br>3) 11.8<br>4) 11.8<br>5) 12.21<br>6) 13.06 | 1) 12.79<br>2) 13.41<br>3) 12.17<br>4) 12.17<br>5) 12.56<br>6) 13.64 | 1) 13.18<br>2) 13.22<br>3) 13.14<br>4) 13.14<br>5) 13.15<br>6) 13.23 |
|                       | SHR+STZ+Irb | 1) 3.6<br>2) 3.2<br>3) 3.1<br>4) 3.0<br>5) 2.6<br>6) 2.8       | 1. 13.6<br>2. 13.3<br>3. 12.9<br>4. 12.3<br>5. 11.8<br>6. 11.5     | 1) 11.8<br>2) 12.3<br>3) 11.5<br>4) 13.3<br>5) 12.9<br>6) 13.6       | 1) 13.3<br>2) 13.0<br>3) 13.6<br>4) 11.5<br>5) 12.3<br>6) 13.3       |
|                       | SHR+STZ+Pio | 1) 3.07<br>2) 3.1<br>3) 3.04<br>4) 3.04                        | 1) 13.58<br>2) 14.08<br>3) 13.08<br>4) 13.08                       | 1) 13.57<br>2) 13.77<br>3) 13.37<br>4) 13.37                         | 1) 13.58<br>2) 13.88<br>3) 13.28<br>4) 13.28                         |

|                             |                     |                                                                |                                                                      |                                                                      |                                                                      |
|-----------------------------|---------------------|----------------------------------------------------------------|----------------------------------------------------------------------|----------------------------------------------------------------------|----------------------------------------------------------------------|
|                             |                     | 5) 3.07<br>6) 3.12                                             | 5) 13.43<br>6) 14.28                                                 | 5) 13.52<br>6) 13.85                                                 | 5) 13.49<br>6) 14.00                                                 |
|                             | SHR+STZ+Adp         | 1) 3.06<br>2) 3.08<br>3) 3.04<br>4) 3.04<br>5) 3.06<br>6) 3.09 | 1) 13.28<br>2) 13.77<br>3) 12.79<br>4) 12.79<br>5) 13.10<br>6) 13.95 | 1) 13.35<br>2) 13.50<br>3) 13.20<br>4) 13.20<br>5) 13.30<br>6) 13.55 | 1) 16.25<br>2) 16.38<br>3) 16.12<br>4) 16.12<br>5) 16.25<br>6) 16.43 |
|                             | SHR+STZ+Adp<br>+Irb | 1) 3.0<br>2) 3.3<br>3) 3.6<br>4) 2.6<br>5) 2.8<br>6) 3.1       | 1) 13.3<br>2) 12.6<br>3) 12.4<br>4) 14.3<br>5) 14.9<br>6) 13.6       | 1) 14.7<br>2) 13.1<br>3) 14.1<br>4) 13.3<br>5) 12.1<br>6) 12.3       | 1) 19.0<br>2) 18.5<br>3) 18.2<br>4) 17.5<br>5) 17.1<br>6) 16.7       |
|                             | SHR+STZ+Adp<br>+Pio | 1) 3.09<br>2) 3.12<br>3) 3.06<br>4) 3.06<br>5) 3.09<br>6) 3.14 | 1) 13.57<br>2) 13.86<br>3) 13.28<br>4) 13.28<br>5) 13.50<br>6) 13.98 | 1) 13.58<br>2) 13.82<br>3) 13.34<br>4) 13.34<br>5) 13.52<br>6) 13.92 | 1) 20.28<br>2) 20.57<br>3) 20.00<br>4) 20.00<br>5) 20.15<br>6) 20.68 |
| Blood<br>glucose<br>(mg/dl) | WKY                 | 1) 89<br>2) 92<br>3) 86<br>4) 90<br>5) 85<br>6) 92             | 1) 88<br>2) 90<br>3) 85<br>4) 89<br>5) 87<br>6) 90                   | 1) 86<br>2) 87<br>3) 85<br>4) 89<br>5) 83<br>6) 86                   | 1) 88<br>2) 90<br>3) 87<br>4) 84<br>5) 85<br>6) 92                   |

|  |             |                                                    |                                                          |                                                          |                                                          |
|--|-------------|----------------------------------------------------|----------------------------------------------------------|----------------------------------------------------------|----------------------------------------------------------|
|  | SHR         | 1) 91<br>2) 95<br>3) 89<br>4) 90<br>5) 94<br>6) 87 | 1) 90<br>2) 90<br>3) 87<br>4) 87<br>5) 91<br>6) 92       | 1) 88<br>2) 91<br>3) 84<br>4) 87<br>5) 86<br>6) 92       | 1) 89<br>2) 92<br>3) 89<br>4) 89<br>5) 89<br>6) 83       |
|  | SHR+STZ     | 1) 90<br>2) 93<br>3) 91<br>4) 89<br>5) 89<br>6) 84 | 1) 460<br>2) 478<br>3) 480<br>4) 450<br>5) 456<br>6) 432 | 1) 471<br>2) 460<br>3) 462<br>4) 465<br>5) 475<br>6) 498 | 1) 489<br>2) 514<br>3) 465<br>4) 465<br>5) 475<br>6) 523 |
|  | SHR+STZ+Irb | 1) 83<br>2) 87<br>3) 88<br>4) 90<br>5) 92<br>6) 94 | 1) 472<br>2) 468<br>3) 462<br>4) 458<br>5) 446<br>6) 442 | 1) 483<br>2) 475<br>3) 467<br>4) 458<br>5) 449<br>6) 440 | 1) 446<br>2) 494<br>3) 478<br>4) 460<br>5) 468<br>6) 474 |
|  | SHR+STZ+Pio | 1) 90<br>2) 95<br>3) 84<br>4) 84<br>5) 94<br>6) 94 | 1) 471<br>2) 492<br>3) 452<br>4) 444<br>5) 470<br>6) 497 | 1) 477<br>2) 496<br>3) 457<br>4) 454<br>5) 478<br>6) 500 | 1) 474<br>2) 489<br>3) 459<br>4) 455<br>5) 476<br>6) 492 |
|  | SHR+STZ+Adp | 1) 88<br>2) 90<br>3) 86<br>4) 86                   | 1) 465<br>2) 484<br>3) 446<br>4) 445                     | 1) 462<br>2) 480<br>3) 444<br>4) 440                     | 1) 484<br>2) 511<br>3) 457<br>4) 460                     |

|  |                     |                                                    |                                                          |                                                          |                                                          |
|--|---------------------|----------------------------------------------------|----------------------------------------------------------|----------------------------------------------------------|----------------------------------------------------------|
|  |                     | 5) 89<br>6) 91                                     | 5) 461<br>6) 491                                         | 5) 462<br>6) 484                                         | 5) 470<br>6) 522                                         |
|  | SHR+STZ+Adp<br>+Irb | 1) 93<br>2) 91<br>3) 90<br>4) 88<br>5) 87<br>6) 85 | 1) 500<br>2) 498<br>3) 490<br>4) 488<br>5) 478<br>6) 474 | 1) 504<br>2) 498<br>3) 490<br>4) 480<br>5) 472<br>6) 460 | 1) 508<br>2) 492<br>3) 484<br>4) 472<br>5) 464<br>6) 454 |
|  | SHR+STZ+Adp<br>+Pio | 1) 86<br>2) 89<br>3) 83<br>4) 82<br>5) 87<br>6) 89 | 1) 479<br>2) 500<br>3) 458<br>4) 454<br>5) 478<br>6) 505 | 1) 486<br>2) 504<br>3) 468<br>4) 462<br>5) 490<br>6) 506 | 1) 480<br>2) 502<br>3) 458<br>4) 454<br>5) 478<br>6) 508 |



| Parameters                     | Groups          | Days of Observation                                      |                                                          |                                                          | Day 28                                                   |
|--------------------------------|-----------------|----------------------------------------------------------|----------------------------------------------------------|----------------------------------------------------------|----------------------------------------------------------|
|                                |                 | Day 0                                                    | Day 8                                                    | Day 21                                                   |                                                          |
| Systolic blood pressure (mmHg) | WKY             | 1. 118<br>2. 127<br>3. 117<br>4. 112<br>5. 116<br>6. 119 | 1. 117<br>2. 115<br>3. 116<br>4. 118<br>5. 121<br>6. 115 | 1. 117<br>2. 119<br>3. 116<br>4. 118<br>5. 120<br>6. 114 | 1. 116<br>2. 119<br>3. 123<br>4. 124<br>5. 120<br>6. 118 |
|                                | SHR             | 1. 155<br>2. 166<br>3. 156<br>4. 161<br>5. 159<br>6. 158 | 1. 165<br>2. 166<br>3. 171<br>4. 160<br>5. 169<br>6. 153 | 1. 165<br>2. 166<br>3. 158<br>4. 161<br>5. 160<br>6. 164 | 1. 150<br>2. 148<br>3. 166<br>4. 157<br>5. 156<br>6. 165 |
|                                | SHR+STZ         | 1. 158<br>2. 165<br>3. 164<br>4. 169<br>5. 156<br>6. 157 | 1. 173<br>2. 170<br>3. 176<br>4. 168<br>5. 175<br>6. 177 | 1. 172<br>2. 175<br>3. 181<br>4. 174<br>5. 179<br>6. 182 | 1. 177<br>2. 176<br>3. 174<br>4. 180<br>5. 173<br>6. 170 |
|                                | SHR+STZ+Irb     | 1. 170<br>2. 165<br>3. 164<br>4. 163<br>5. 160<br>6. 156 | 1. 185<br>2. 180<br>3. 178<br>4. 176<br>5. 175<br>6. 168 | 1. 152<br>2. 150<br>3. 148<br>4. 147<br>5. 146<br>6. 139 | 1. 141<br>2. 136<br>3. 135<br>4. 134<br>5. 133<br>6. 131 |
|                                | SHR+STZ+Pio     | 1. 165<br>2. 166<br>3. 173<br>4. 156<br>5. 169<br>6. 161 | 1. 175<br>2. 180<br>3. 185<br>4. 174<br>5. 179<br>6. 181 | 1. 154<br>2. 155<br>3. 152<br>4. 153<br>5. 156<br>6. 160 | 1. 138<br>2. 143<br>3. 153<br>4. 156<br>5. 151<br>6. 147 |
|                                | SHR+STZ+Adp     | 1. 159<br>2. 166<br>3. 158<br>4. 161<br>5. 160<br>6. 168 | 1. 177<br>2. 176<br>3. 174<br>4. 172<br>5. 173<br>6. 178 | 1. 173<br>2. 170<br>3. 176<br>4. 171<br>5. 175<br>6. 179 | 1. 135<br>2. 136<br>3. 144<br>4. 143<br>5. 139<br>6. 133 |
|                                | SHR+STZ+Adp+Irb | 1. 169<br>2. 166<br>3. 165<br>4. 164<br>5. 162<br>6. 158 | 1. 181<br>2. 178<br>3. 177<br>4. 176<br>5. 174<br>6. 170 | 1. 155<br>2. 150<br>3. 148<br>4. 147<br>5. 146<br>6. 142 | 1. 123<br>2. 119<br>3. 118<br>4. 117<br>5. 116<br>6. 115 |
|                                | SHR+STZ+Adp+Pio | 1. 159<br>2. 166<br>3. 158<br>4. 165<br>5. 160<br>6. 171 | 1. 172<br>2. 175<br>3. 181<br>4. 174<br>5. 179<br>6. 182 | 1. 148<br>2. 155<br>3. 152<br>4. 153<br>5. 156<br>6. 160 | 1. 132<br>2. 130<br>3. 137<br>4. 139<br>5. 135<br>6. 131 |

|                                       |                                      |                                                             |                                                          |                                                          |                                                                |                |
|---------------------------------------|--------------------------------------|-------------------------------------------------------------|----------------------------------------------------------|----------------------------------------------------------|----------------------------------------------------------------|----------------|
| <b>Diastolic blood pressure(mmHg)</b> | WKY                                  | 1. 75<br>2. 77<br>3. 78<br>4. 79<br>5. 84<br>6. 82          | 1. 90<br>2. 87<br>3. 78<br>4. 80<br>5. 84<br>6. 85       | 1. 80<br>2. 77<br>3. 78<br>4. 79<br>5. 84<br>6. 82       | 1. 91<br>2. 92<br>3. 81<br>4. 80<br>5. 83<br>6. 90             |                |
|                                       | SHR                                  | 1. 110<br>2. 115<br>3. 119<br>4. 122<br>5. 124<br>6. 126    | 1. 107<br>2. 115<br>3. 113<br>4. 122<br>5. 125<br>6. 120 | 1. 106<br>2. 112<br>3. 98<br>4. 118<br>5. 105<br>6. 110  | 1. 112<br>2. 115<br>3. 120<br>4. 122<br>5. 124<br>6. 127       |                |
|                                       | SHR+STZ                              | 1. 112<br>2. 117<br>3. 113<br>4. 121<br>5. 119<br>6. 120    | 1. 116<br>2. 117<br>3. 119<br>4. 122<br>5. 121<br>6. 120 | 1. 116<br>2. 117<br>3. 119<br>4. 122<br>5. 123<br>6. 124 | 1. 115<br>2. 117<br>3. 113<br>4. 121<br>5. 119<br>6. 124       |                |
|                                       | SHR+STZ+Irb                          | 7. 121<br>8. 120<br>9. 119<br>10. 118<br>11. 116<br>12. 114 | 1. 126<br>2. 122<br>3. 123<br>4. 121<br>5. 119<br>6. 115 | 1. 104<br>2. 103<br>3. 102<br>4. 100<br>5. 99<br>6. 98   | 1. 94.5<br>2. 93.5<br>3. 92.5<br>4. 91.5<br>5. 90.5<br>6. 89.5 |                |
|                                       | SHR+STZ+Pio                          | 1. 112<br>2. 115<br>3. 113<br>4. 121<br>5. 117<br>6. 118    | 1. 115<br>2. 117<br>3. 119<br>4. 122<br>5. 121<br>6. 120 | 1. 109<br>2. 112<br>3. 100<br>4. 115<br>5. 108<br>6. 110 | 1. 109<br>2. 103<br>3. 98<br>4. 108<br>5. 108<br>6. 110        |                |
|                                       | SHR+STZ+Adp                          | 1. 111<br>2. 117<br>3. 113<br>4. 121<br>5. 119<br>6. 121    | 1. 114<br>2. 117<br>3. 119<br>4. 122<br>5. 123<br>6. 125 | 1. 115<br>2. 117<br>3. 113<br>4. 121<br>5. 119<br>6. 124 | 1. 94<br>2. 92<br>3. 95<br>4. 97<br>5. 98<br>6. 100            |                |
|                                       | SHR+STZ+Adp+Irb                      | 1. 121<br>2. 118<br>3. 116<br>4. 115<br>5. 112<br>6. 108    | 1. 123<br>2. 121<br>3. 118<br>4. 117<br>5. 116<br>6. 113 | 1. 107<br>2. 105<br>3. 104<br>4. 103<br>5. 101<br>6. 98  | 1. 92<br>2. 90<br>3. 89<br>4. 87<br>5. 86<br>6. 84             |                |
|                                       | SHR+STZ+Adp+Pio                      | 1. 115<br>2. 117<br>3. 113<br>4. 121<br>5. 119<br>6. 123    | 1. 118<br>2. 117<br>3. 119<br>4. 122<br>5. 121<br>6. 123 | 1. 106<br>2. 114<br>3. 111<br>4. 113<br>5. 115<br>6. 107 | 1. 97<br>2. 96<br>3. 99<br>4. 101<br>5. 95<br>6. 100           |                |
|                                       | <b>Mean arterial pressure (mmHg)</b> | WKY                                                         | 1. 84<br>2. 86                                           | 1. 92<br>2. 93                                           | 1. 87<br>2. 88                                                 | 1. 90<br>2. 92 |

|  |                 |                                                          |                                                          |                                                          |                                                          |
|--|-----------------|----------------------------------------------------------|----------------------------------------------------------|----------------------------------------------------------|----------------------------------------------------------|
|  |                 | 3. 98<br>4. 102<br>5. 82<br>6. 100                       | 3. 96<br>4. 97<br>5. 100<br>6. 104                       | 3. 90<br>4. 92<br>5. 96<br>6. 99                         | 3. 96<br>4. 97<br>5. 103<br>6. 104                       |
|  | SHR             | 1. 129<br>2. 125<br>3. 130<br>4. 134<br>5. 135<br>6. 139 | 1. 130<br>2. 127<br>3. 132<br>4. 134<br>5. 135<br>6. 140 | 1. 120<br>2. 119<br>3. 124<br>4. 130<br>5. 131<br>6. 132 | 1. 127<br>2. 123<br>3. 130<br>4. 134<br>5. 135<br>6. 143 |
|  | SHR+STZ         | 1. 127<br>2. 122<br>3. 130<br>4. 134<br>5. 135<br>6. 144 | 1. 131<br>2. 134<br>3. 132<br>4. 137<br>5. 142<br>6. 146 | 1. 137<br>2. 139<br>3. 142<br>4. 145<br>5. 148<br>6. 147 | 1. 136<br>2. 141<br>3. 143<br>4. 146<br>5. 148<br>6. 150 |
|  | SHR+STZ+Irb     | 1. 140<br>2. 137<br>3. 135<br>4. 132<br>5. 129<br>6. 125 | 1. 148<br>2. 146<br>3. 142<br>4. 138<br>5. 135<br>6. 131 | 1. 123<br>2. 120<br>3. 119<br>4. 117<br>5. 116<br>6. 113 | 1. 113<br>2. 109<br>3. 107<br>4. 104<br>5. 103<br>6. 100 |
|  | SHR+STZ+Pio     | 1. 127<br>2. 128<br>3. 130<br>4. 134<br>5. 135<br>6. 138 | 1. 133<br>2. 135<br>3. 138<br>4. 139<br>5. 144<br>6. 145 | 1. 118<br>2. 122<br>3. 124<br>4. 125<br>5. 127<br>6. 128 | 1. 112<br>2. 116<br>3. 120<br>4. 122<br>5. 124<br>6. 126 |
|  | SHR+STZ+Adp     | 1. 128<br>2. 130<br>3. 132<br>4. 134<br>5. 132<br>6. 136 | 1. 132<br>2. 133<br>3. 135<br>4. 138<br>5. 142<br>6. 148 | 1. 131<br>2. 134<br>3. 132<br>4. 137<br>5. 142<br>6. 146 | 1. 98<br>2. 106<br>3. 110<br>4. 112<br>5. 114<br>6. 120  |
|  | SHR+STZ+Adp+Irb | 1. 137<br>2. 133<br>3. 132<br>4. 131<br>5. 129<br>6. 124 | 1. 145<br>2. 140<br>3. 138<br>4. 137<br>5. 135<br>6. 127 | 1. 124<br>2. 120<br>3. 117<br>4. 119<br>5. 116<br>6. 112 | 1. 105<br>2. 104<br>3. 100<br>4. 96<br>5. 92<br>6. 91    |
|  | SHR+STZ+Adp+Pio | 1. 130<br>2. 127<br>3. 132<br>4. 134<br>5. 135<br>6. 140 | 1. 133<br>2. 135<br>3. 138<br>4. 139<br>5. 144<br>6. 145 | 1. 120<br>2. 122<br>3. 124<br>4. 126<br>5. 128<br>6. 130 | 1. 98<br>2. 100<br>3. 102<br>4. 106<br>5. 108<br>6. 116  |
|  | WKY             | 1. 295                                                   | 1. 302                                                   | 1. 292                                                   | 1. 290                                                   |

|               |                 |                                                          |                                                          |                                                          |                                                          |
|---------------|-----------------|----------------------------------------------------------|----------------------------------------------------------|----------------------------------------------------------|----------------------------------------------------------|
| HR (beat/min) |                 | 2. 306<br>3. 312<br>4. 316<br>5. 318<br>6. 325           | 2. 306<br>3. 308<br>4. 310<br>5. 314<br>6. 316           | 2. 304<br>3. 309<br>4. 310<br>5. 313<br>6. 326           | 2. 299<br>3. 303<br>4. 304<br>5. 308<br>6. 314           |
|               | SHR             | 1. 376<br>2. 380<br>3. 382<br>4. 384<br>5. 394<br>6. 400 | 1. 376<br>2. 380<br>3. 390<br>4. 394<br>5. 398<br>6. 402 | 1. 374<br>2. 386<br>3. 388<br>4. 390<br>5. 398<br>6. 416 | 1. 376<br>2. 380<br>3. 384<br>4. 392<br>5. 396<br>6. 406 |
|               | SHR+STZ         | 1. 380<br>2. 382<br>3. 384<br>4. 386<br>5. 388<br>6. 402 | 1. 376<br>2. 388<br>3. 390<br>4. 392<br>5. 394<br>6. 424 | 1. 396<br>2. 398<br>3. 402<br>4. 403<br>5. 405<br>6. 408 | 1. 400<br>2. 405<br>3. 406<br>4. 407<br>5. 409<br>6. 415 |
|               | SHR+STZ+Irb     | 1. 392<br>2. 388<br>3. 385<br>4. 383<br>5. 382<br>6. 380 | 1. 402<br>2. 398<br>3. 397<br>4. 396<br>5. 395<br>6. 388 | 1. 398<br>2. 395<br>3. 394<br>4. 393<br>5. 392<br>6. 386 | 1. 392<br>2. 387<br>3. 386<br>4. 385<br>5. 384<br>6. 382 |
|               | SHR+STZ+Pio     | 1. 379<br>2. 386<br>3. 387<br>4. 388<br>5. 392<br>6. 396 | 1. 396<br>2. 398<br>3. 399<br>4. 400<br>5. 401<br>6. 406 | 1. 376<br>2. 378<br>3. 379<br>4. 380<br>5. 381<br>6. 386 | 1. 360<br>2. 365<br>3. 367<br>4. 368<br>5. 369<br>6. 373 |
|               | SHR+STZ+Adp     | 1. 378<br>2. 381<br>3. 382<br>4. 383<br>5. 385<br>6. 389 | 1. 390<br>2. 396<br>3. 398<br>4. 399<br>5. 400<br>6. 405 | 1. 389<br>2. 393<br>3. 394<br>4. 395<br>5. 396<br>6. 403 | 1. 351<br>2. 354<br>3. 356<br>4. 357<br>5. 358<br>6. 360 |
|               | SHR+STZ+Adp+Irb | 1. 395<br>2. 387<br>3. 386<br>4. 385<br>5. 384<br>6. 379 | 1. 408<br>2. 400<br>3. 402<br>4. 401<br>5. 399<br>6. 396 | 1. 390<br>2. 395<br>3. 396<br>4. 397<br>5. 398<br>6. 400 | 1. 365<br>2. 362<br>3. 361<br>4. 360<br>5. 358<br>6. 354 |
|               | SHR+STZ+Adp+Pio | 1. 376<br>2. 386<br>3. 387<br>4. 388<br>5. 389<br>6. 396 | 1. 396<br>2. 401<br>3. 402<br>4. 403<br>5. 404<br>6. 412 | 1. 367<br>2. 375<br>3. 376<br>4. 377<br>5. 381<br>6. 386 | 1. 344<br>2. 349<br>3. 350<br>4. 351<br>5. 355<br>6. 357 |

| <b>Parameters</b>                    | <b>Groups</b> | Triglycerides<br>(mg/dL) | Total<br>cholesterol<br>(mg/dL) | HDL<br>(mg/dL) | LDL<br>(mg/dL) |      |     |
|--------------------------------------|---------------|--------------------------|---------------------------------|----------------|----------------|------|-----|
| Triglycerides<br>and<br>lipoproteins | WKY+CNT       | 56.2                     | 64                              | 18.6           | 38.5           |      |     |
|                                      |               |                          | 54.3                            | 63             | 18             | 38   |     |
|                                      |               |                          | 52.5                            | 62             | 16.5           | 36   |     |
|                                      |               |                          | 50.3                            | 61             | 16             | 35.5 |     |
|                                      |               |                          | 46.2                            | 59.5           | 14.5           | 35   |     |
|                                      |               |                          | 45                              | 58             | 14.4           | 34.5 |     |
|                                      |               |                          |                                 |                |                |      |     |
|                                      |               |                          | SHR+CNT                         | 98             | 173            | 73   | 106 |
|                                      |               |                          |                                 | 92             | 165            | 68.5 | 100 |
|                                      |               |                          |                                 | 88             | 154            | 68   | 99  |
|                                      |               |                          | 86                              | 145            | 66.5           | 98   |     |
|                                      |               |                          | 80                              | 135            | 65.5           | 94   |     |
|                                      |               |                          | 65                              | 127            | 62             | 88   |     |
|                                      |               |                          |                                 |                |                |      |     |
|                                      |               | SHR+STZ                  | 190                             | 214            | 50             | 130  |     |
|                                      |               |                          | 184                             | 208            | 41             | 124  |     |
|                                      |               |                          | 178                             | 200            | 43             | 122  |     |
|                                      |               |                          | 168                             | 194            | 42             | 120  |     |
|                                      |               |                          | 160                             | 188            | 40             | 126  |     |
|                                      |               |                          | 154                             | 180            | 36             | 112  |     |
|                                      |               |                          |                                 |                |                |      |     |
|                                      | SHR+STZ+Irb   | 168                      | 187                             | 66             | 120            |      |     |
|                                      |               | 162                      | 180                             | 62             | 114            |      |     |
|                                      |               | 156                      | 170                             | 64             | 108            |      |     |

|  |                 |     |     |      |     |
|--|-----------------|-----|-----|------|-----|
|  |                 | 154 | 162 | 60   | 106 |
|  |                 | 145 | 155 | 58   | 104 |
|  |                 | 138 | 146 | 54   | 98  |
|  |                 |     |     |      |     |
|  | SHR+STZ+Pio     | 160 | 170 | 75   | 108 |
|  |                 | 156 | 162 | 74.5 | 104 |
|  |                 | 150 | 158 | 72.5 | 103 |
|  |                 | 144 | 152 | 73.5 | 99  |
|  |                 | 138 | 144 | 71.5 | 92  |
|  |                 | 134 | 138 | 68   | 88  |
|  |                 |     |     |      |     |
|  | SHR+STZ+Adp     | 104 | 146 | 84   | 103 |
|  |                 | 100 | 138 | 79   | 98  |
|  |                 | 96  | 132 | 78   | 95  |
|  |                 | 92  | 126 | 81   | 96  |
|  |                 | 86  | 120 | 82   | 97  |
|  |                 | 82  | 112 | 74   | 87  |
|  |                 |     |     |      |     |
|  | SHR+STZ+Irb+Adp | 88  | 145 | 84   | 102 |
|  |                 | 86  | 140 | 79   | 98  |
|  |                 | 85  | 138 | 78   | 96  |
|  |                 | 84  | 136 | 81   | 94  |
|  |                 | 87  | 132 | 82   | 93  |
|  |                 | 82  | 129 | 74   | 89  |
|  |                 |     |     |      |     |
|  | SHR+STZ+Pio+Adp | 79  | 130 | 86   | 97  |
|  |                 | 76  | 121 | 79   | 95  |

|  |  |    |     |    |    |
|--|--|----|-----|----|----|
|  |  | 74 | 120 | 77 | 86 |
|  |  | 73 | 118 | 78 | 93 |
|  |  | 72 | 116 | 76 | 92 |
|  |  | 65 | 111 | 70 | 84 |

| <b>Parameters</b>                    | <b>Groups</b> | Triglycerides<br>(mg/dL) | Total<br>cholesterol<br>(mg/dL) | HDL<br>(mg/dL) | LDL<br>(mg/dL) |
|--------------------------------------|---------------|--------------------------|---------------------------------|----------------|----------------|
| Triglycerides<br>and<br>lipoproteins | WKY+CNT       | 56.2                     | 64                              | 18.6           | 38.5           |
|                                      |               | 54.3                     | 63                              | 18             | 38             |
|                                      |               | 52.5                     | 62                              | 16.5           | 36             |
|                                      |               | 50.3                     | 61                              | 16             | 35.5           |
|                                      |               | 46.2                     | 59.5                            | 14.5           | 35             |
|                                      |               | 45                       | 58                              | 14.4           | 34.5           |
|                                      |               |                          |                                 |                |                |
|                                      | SHR+CNT       | 98                       | 173                             | 73             | 106            |
|                                      |               | 92                       | 165                             | 68.5           | 100            |
|                                      |               | 88                       | 154                             | 68             | 99             |
|                                      |               | 86                       | 145                             | 66.5           | 98             |
|                                      |               | 80                       | 135                             | 65.5           | 94             |
|                                      |               | 65                       | 127                             | 62             | 88             |
|                                      |               |                          |                                 |                |                |
|                                      | SHR+STZ       | 190                      | 214                             | 50             | 130            |
|                                      |               | 184                      | 208                             | 41             | 124            |
|                                      |               | 178                      | 200                             | 43             | 122            |
|                                      |               | 168                      | 194                             | 42             | 120            |
|                                      |               | 160                      | 188                             | 40             | 126            |
|                                      |               | 154                      | 180                             | 36             | 112            |
|                                      |               |                          |                                 |                |                |



|  |                 |     |     |      |     |
|--|-----------------|-----|-----|------|-----|
|  | SHR+STZ+Irb     | 168 | 187 | 66   | 120 |
|  |                 | 162 | 180 | 62   | 114 |
|  |                 | 156 | 170 | 64   | 108 |
|  |                 | 154 | 162 | 60   | 106 |
|  |                 | 145 | 155 | 58   | 104 |
|  |                 | 138 | 146 | 54   | 98  |
|  |                 |     |     |      |     |
|  | SHR+STZ+Pio     | 160 | 170 | 75   | 108 |
|  |                 | 156 | 162 | 74.5 | 104 |
|  |                 | 150 | 158 | 72.5 | 103 |
|  |                 | 144 | 152 | 73.5 | 99  |
|  |                 | 138 | 144 | 71.5 | 92  |
|  |                 | 134 | 138 | 68   | 88  |
|  |                 |     |     |      |     |
|  | SHR+STZ+Adp     | 104 | 146 | 84   | 103 |
|  |                 | 100 | 138 | 79   | 98  |
|  |                 | 96  | 132 | 78   | 95  |
|  |                 | 92  | 126 | 81   | 96  |
|  |                 | 86  | 120 | 82   | 97  |
|  |                 | 82  | 112 | 74   | 87  |
|  |                 |     |     |      |     |
|  | SHR+STZ+Irb+Adp | 88  | 145 | 84   | 102 |
|  |                 | 86  | 140 | 79   | 98  |
|  |                 | 85  | 138 | 78   | 96  |
|  |                 | 84  | 136 | 81   | 94  |

|  |                 |    |     |    |    |
|--|-----------------|----|-----|----|----|
|  |                 | 87 | 132 | 82 | 93 |
|  |                 | 82 | 129 | 74 | 89 |
|  |                 |    |     |    |    |
|  | SHR+STZ+Pio+Adp | 79 | 130 | 86 | 97 |
|  |                 | 76 | 121 | 79 | 95 |
|  |                 | 74 | 120 | 77 | 86 |
|  |                 | 73 | 118 | 78 | 93 |
|  |                 | 72 | 116 | 76 | 92 |
|  |                 | 65 | 111 | 70 | 84 |
